# Supplementary material
Source: PubMed Central journal article supplement (PMC4154066)

## Supporting Information for:

**A systematic study of mitochondrial toxicity of environmental chemicals using quantitative high throughput screening**

Matias S. Attene-Ramos<sup>†</sup>, Ruili Huang<sup>†</sup>, Srilatha Sakamuru<sup>†</sup>, Kristine L. Witt<sup>‡</sup>, Gyda C. Beeson<sup>§</sup>, Louie Shou<sup>†</sup>, Rick G. Schnellmann<sup>§</sup>, Craig C. Beeson<sup>§, ||</sup>, Raymond R. Tice<sup>‡</sup>, Christopher P. Austin<sup>†</sup>, and Menghang Xia<sup>†</sup>

<sup>†</sup>National Center for Advancing Translational Sciences, National Institutes of Health, Bethesda, MD 20892

<sup>‡</sup>National Institute of Environmental Health Sciences, Division of the National Toxicology Program, Research Triangle Park, NC 27709

<sup>§</sup>Department of Drug Discovery and Biomedical Sciences, Medical University of South Carolina, Charleston, SC 29425

<sup>||</sup> MitoHealth, Charleston SC 29403

Address correspondence to:

Menghang Xia, Ph.D.

National Institutes of Health, National Center for Advancing Translational Sciences, NIH Chemical Genomics Center

9800 Medical Center Drive, Bethesda, MD 20892-3370

Phone: 301-217-5718

Email: mxia@mail.nih.gov

**Table S1** A description of the chemical clusters generated by the 76 active compounds in the MMP assay for both the 1 and 5 h time points. The 76 active compounds for 1 and 5 h were clustered based on structural similarity [Hierarchical (agglomerative) nesting] using the Leadscape software (Leadscape Inc., Columbus, OH, USA), resulting in 11 structural clusters and 23 singletons. Some inactive compound (both in screening and follow up MMP studies) that has a close structure to the members of each cluster has listed as an example.

| Cluster    | Scaffold                                                                            | Number of compounds in cluster | Inactive compound                                                                                             |
|------------|-------------------------------------------------------------------------------------|--------------------------------|---------------------------------------------------------------------------------------------------------------|
| Singletons |                                                                                     | 23                             |                                                                                                               |
| 1          | 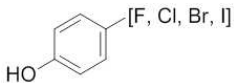   | 12                             | <br>2,6-Dichlorophenol     |
| 2          |    | 10                             | <br>Cresol (m-/p- mixture) |
| 3          |   | 6                              |                                                                                                               |
| 4          |  | 5                              | <br>Coumarin             |
| 5          |  | 7                              |                          |

|    |                                                                                     |   |                                                                                                                                 |
|----|-------------------------------------------------------------------------------------|---|---------------------------------------------------------------------------------------------------------------------------------|
|    |                                                                                     |   | 1-Naphthylamine                                                                                                                 |
| 6  | 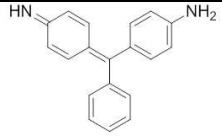   | 3 |                                                                                                                                 |
| 7  |    | 2 | <br>N,N,N',N'-Tetramethyl-p-phenylenediamine |
| 8  |    | 2 | <br>N-Nitrosodiphenylamine                   |
| 9  |   | 2 |                                                                                                                                 |
| 10 |  | 2 | <br>Carminic acid                          |

|    |                                                                                                                                 |   |  |
|----|---------------------------------------------------------------------------------------------------------------------------------|---|--|
| 11 | 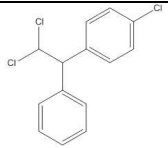<br><chem>ClC(Cl)(c1ccccc1)c2ccc(Cl)cc2</chem> | 2 |  |
|----|---------------------------------------------------------------------------------------------------------------------------------|---|--|

**Table S2** A summary of previously published screening data (compound potency (half maximal activity concentration,  $\mu\text{M}$ )) for the 38 compounds. Activation of caspase 9 and 3/7 was measured at 5 and 16 h of treatment, respectively, while cytotoxicity based on ATP content was measured at 40 h of treatment<sup>22, 34</sup>. Compounds were defined as active (curves 1.1, 1.2 and 2.1), inconclusive (curves 1.3, 1.4, 2.2, 2.3, 2.4 and 3) and inactives (curves 4) according to the type of concentration response curve observed<sup>21, 26</sup>.

| Sample Name                            | Caspase 9, 5 h | Caspase 3, 16h | Cytotoxicity<br>(based on ATP<br>content), 40 h |
|----------------------------------------|----------------|----------------|-------------------------------------------------|
| 1,5-Naphthalenediamine                 | Inactive       | Inactive       | Inactive                                        |
| 1,8-Dihydroxy-4,5-dinitroanthraquinone | Inactive       | Inactive       | 29.33                                           |
| 2,2'-Methylenebis-(4-chlorophenol)     | Inactive       | Inconclusive   | 26.59                                           |
| 2,2'-Thiobis(4-chlorophenol)           | Inactive       | Inactive       | 27.16                                           |
| 2-Aminoanthraquinone                   | Inconclusive   | Inactive       | Inconclusive                                    |
| 3,4,5-Trichlorophenol                  | Inactive       | Inactive       | 50.12                                           |
| 3,4-Dichlorophenyl isocyanate          | Inactive       | Inactive       | 38.70                                           |
| 4,4-Thiobis(6-t-butyl-m-cresol)        | Inconclusive   | 70.79          | 31.62                                           |
| 4-Cumylphenol                          | Inactive       | Inconclusive   | Inactive                                        |
| 4-Hydroxyphenyl retinamide             | Inconclusive   | 31.62          | 25.12                                           |
| Apigenin                               | Inactive       | Inactive       | 41.43                                           |

|                                                   |              |              |              |
|---------------------------------------------------|--------------|--------------|--------------|
| Basic red 9 (p-Rosaniline HCl)                    | Inactive     | Inactive     | 7.17         |
| Captan                                            | Inactive     | Inactive     | 15.27        |
| Curcumin                                          | Inactive     | Inactive     | 43.42        |
| Diethylstilbestrol [DES]                          | Inactive     | Inactive     | Inactive     |
| Digitonin                                         | Inactive     | Inactive     | 12.24        |
| Diphenylurea                                      | Inactive     | Inactive     | Inconclusive |
| Emodin                                            | Inconclusive | Inactive     | 46.49        |
| Formulated fenaminosulf (Dexon)                   | Inactive     | Inactive     | 4.48         |
| Genistein (4',5,7-Trihydroxyisoflavone)           | Inconclusive | Inactive     | Inconclusive |
| Hexachlorophene                                   | Inactive     | Inactive     | 6.50         |
| Hexamethyl-p-rosaniline chloride (Gentian violet) | 70.79        | 28.18        | 2.61         |
| Kaempferol                                        | Inactive     | Inactive     | Inactive     |
| Kepone                                            | Inconclusive | Inconclusive | 29.33        |
| Malachite green oxalate                           | Inconclusive | 0.63         | 1.65         |
| Nitazoxanide                                      | Inactive     | Inactive     | 9.36         |
| N-Phenyl-2-naphthylamine                          | Inactive     | Inactive     | Inactive     |
| o,p'-DDD (Mitotane)                               | Inactive     | Inactive     | Inactive     |

|                               |              |              |              |
|-------------------------------|--------------|--------------|--------------|
| o-Benzyl-p-chlorophenol       | Inactive     | Inactive     | Inactive     |
| p -n -Nonylphenol             | Inconclusive | Inconclusive | Inconclusive |
| p-Aminophenol                 | Inactive     | Inactive     | 63.90        |
| Phenmedipham                  | Inactive     | Inactive     | Inconclusive |
| Phenyl mercuric acetate       | Inactive     | Inactive     | 5.88         |
| Resveratrol                   | Inconclusive | Inactive     | Inconclusive |
| Riboflavin                    | Inactive     | Inactive     | Inactive     |
| Silibinin                     | Inactive     | Inactive     | Inactive     |
| tetra-N-Octylammonium bromide | Inconclusive | 14.13        | 4.18         |
| Zearalenone                   | Inactive     | Inactive     | 29.91        |

**Figure S1** qHTS MMP assay experimental design: a) A detailed protocol of the MMP screen, and b) a plate map of the control plate used for the screen. Columns 1 to 3 have different concentrations of the control FCCP. Column 4 has DMSO. Columns 5 to 48 are empty (in the assay plates will receive compounds from the library (compound) plates).

a

| Step | Parameter         | Value          | Description                                                                          |
|------|-------------------|----------------|--------------------------------------------------------------------------------------|
| 1    | Plate cells       | 2000 cells/5uL | Plate Cells in black clear bottom 1536 well plates, using 8 tip dispense (Multidrop) |
| 2    | Incubation time   | Overnight      | Incubate at 37° C, 5% CO <sub>2</sub> .                                              |
| 3    | Compound Addition | 23nL           | Pintool transfer of control (1-4 columns) and compound library (5-48 columns).       |
| 4    | Incubation time   | 1 hr/5h        | Incubate at 37° C, 5% CO <sub>2</sub> .                                              |
| 5    | Reagent           | 5uL            | Addition of MMP dye solution (Bioraptr)                                              |
| 6    | Incubation time   | 30 min         | Incubate at 37° C, 5% CO <sub>2</sub>                                                |
| 7    | Readout           | Envision       | Protocol name: Mitochondrial FITC Bottom, at Ex: FITC 485; Em: FITC 535              |

b

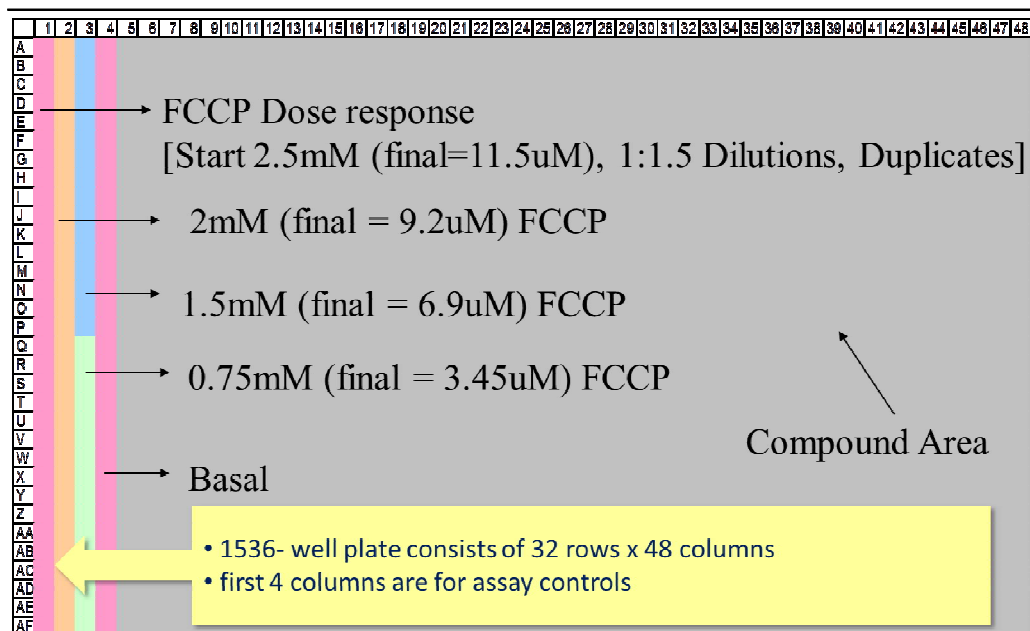

Supplement: NIHMS513600-supplement-1_si_001.pdf [file NIHMS513600-supplement-1_si_001.pdf]
